# Supplementary material for: A cost analysis of intensified vs conventional multifactorial therapy in individuals with type 2 diabetes: a post hoc analysis of the Steno-2 study
Source: PubMed Central journal article supplement (PMC6290682; doi:10.1007/s00125-018-4739-3), 2018-10-06
Supplement: 125_2018_4739_MOESM1_ESM.pdf [file 125_2018_4739_MOESM1_ESM.pdf]

## Electronic supplementary materials

**ESM Table 1: Treatment targets**

|                                                 | Intensive |           | Conventional |           |
|-------------------------------------------------|-----------|-----------|--------------|-----------|
|                                                 | 1993-1999 | 2000-2001 | 1993-1999    | 2000-2001 |
| Systolic blood pressure (mm Hg)                 | < 140     | < 130     | < 160        | < 135     |
| Diastolic blood pressure (mm Hg)                | < 85      | < 80      | < 95         | < 85      |
| HbA <sub>1c</sub> (%)                           | < 6.5     | < 6.5     | < 7.5        | < 6.5     |
| HbA <sub>1c</sub> (mmol/mol)                    | < 48      | < 48      | < 58         | < 48      |
| Fasting serum total cholesterol (mmol/l)        | < 4.9     | < 4.5     | < 6.5        | < 4.9     |
| Fasting serum triacylglycerol (mmol/l)          | < 1.7     | < 1.7     | < 2.2        | < 2.0     |
| Treatment with ACE-inhibitor irrespective of BP | Yes       | Yes       | No           | Yes       |
| Aspirin therapy                                 |           |           |              |           |
| Known ischemia                                  | Yes       | Yes       | Yes          | Yes       |
| Peripheral vascular disease                     | Yes       | Yes       | No           | No        |
| No known vascular disease                       | No        | Yes       | No           | No        |

Treatment targets for treatments group during the initial 7.8 years of the Steno-2 trial. The conventional therapy group were at all times treated with targets as least as strict as recommended in national guidelines. Any behavioural and pharmacological intervention was allowed in order to achieve targets. Aspirin treatment was initiated if any of the indication criteria were met. The mean intervention duration was 7.8 years and hereafter all patients were offered treatment similar to that of the original intensive therapy group.

ESM Fig. 1

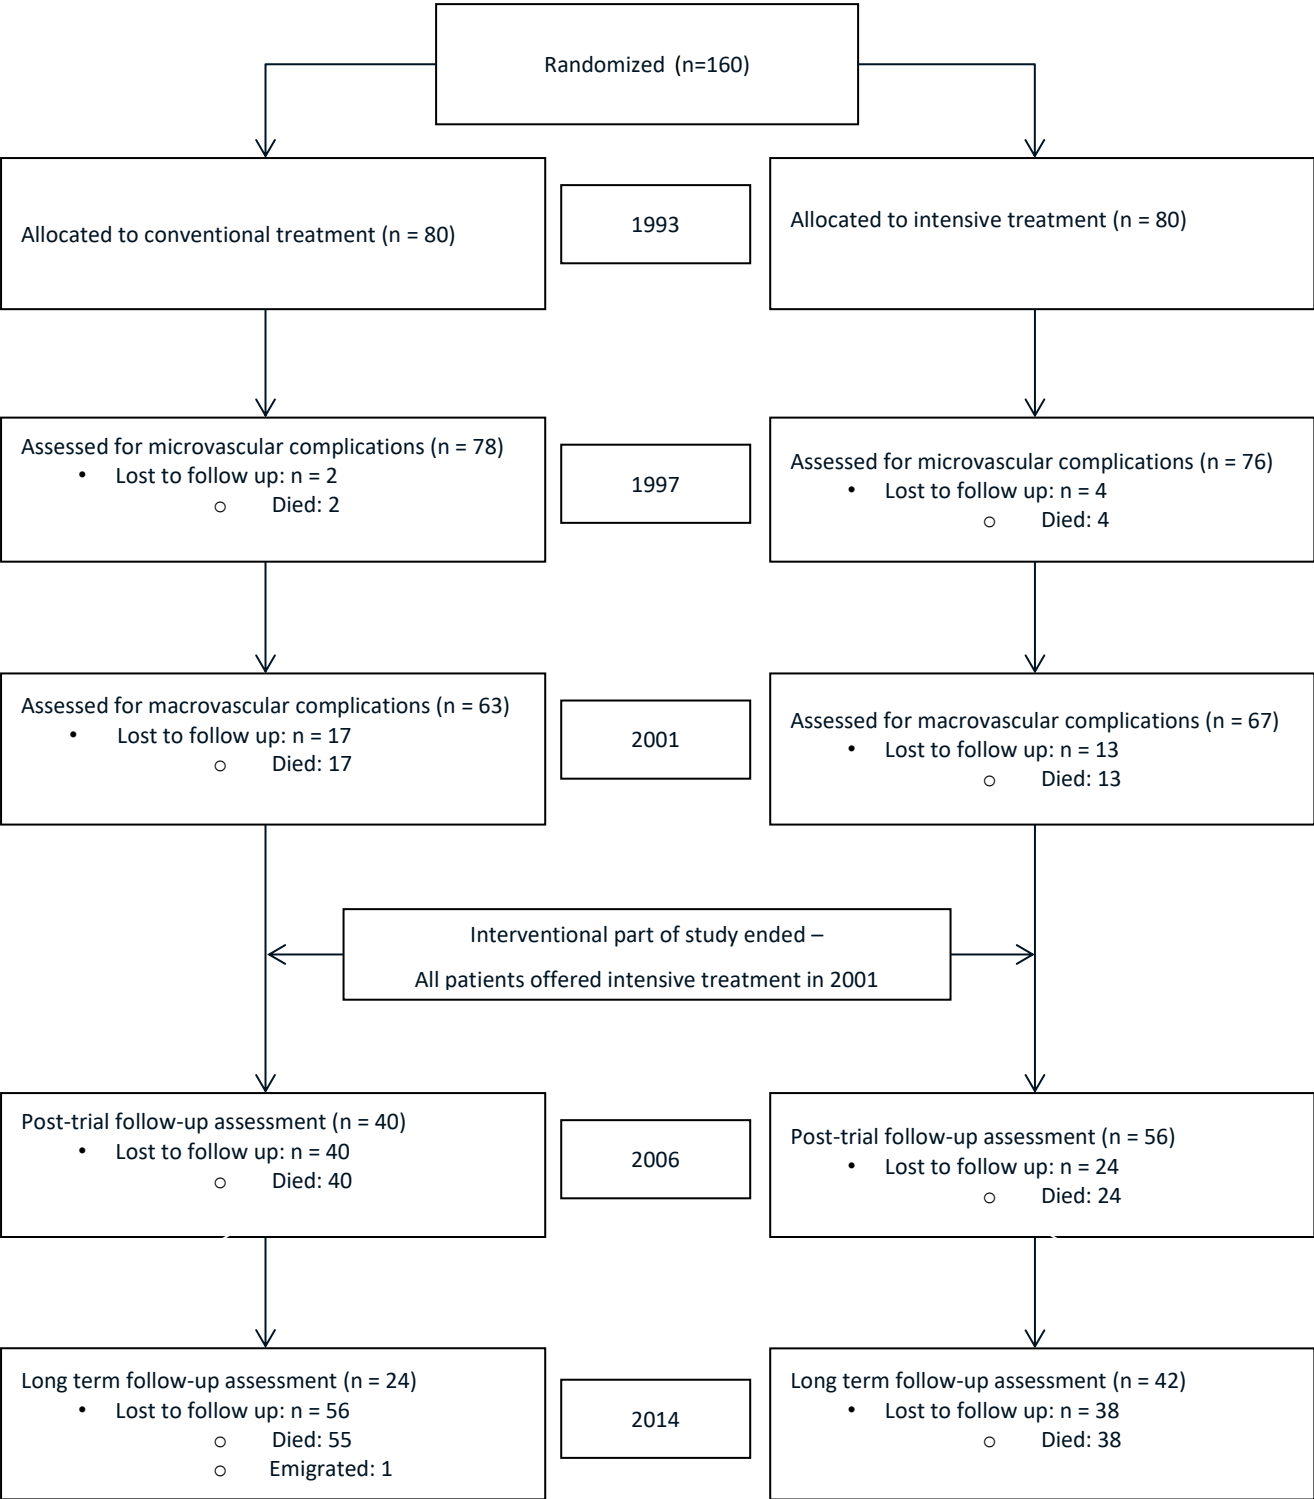

ESM Fig. 1: Consort diagram showing the flow of patients in the two treatment groups of the Steno-2 trial and post-trial follow-up. The intervention was neutralised after a mean of 7.8 years and the study continued as an observational follow-up trial with all patients being suggested intensified treatment.
